# Supplementary material for: Interactions between Cytosolic Phospholipase A2 Activation and Mitochondrial Reactive Oxygen Species Production in the Development of Ventilator-Induced Diaphragm Dysfunction
Source: Oxid Med Cell Longev. 2019 Apr 18;2019:2561929. doi: 10.1155/2019/2561929 (PMC6501131; doi:10.1155/2019/2561929)
Supplement: Supplementary Materials — sTable 1: body weight, MAP, HR, and RT (mean ± SD). BW = body weight;MAP = mean arterial pressure;HR = heart rate;RT = rectal temperature; MV = mechanical ventilation;CDIBA = 4-{2-[5-chloro-1-(diphenylmethyl)-2-methyl-1H-indol3-yl]-ethoxy} benzoic acid (cPLA2 inhibitor): MitoT = MitoTEMPO. BW was determined before the experiment. Values of MAP, HR, and RT at the end of study are presented here. [file 2561929.f1.pdf]

# Supplementary materials

**sTable 1. Body weight, MAP, HR, and RT (mean  $\pm$  SD)**

| Group (n =5)       | BW (g)       | MAP (mmHg)   | HR (bpm)     | RT ( $^{\circ}$ C) |
|--------------------|--------------|--------------|--------------|--------------------|
| Control            | 464 $\pm$ 48 | 142 $\pm$ 22 | 398 $\pm$ 38 | 37.2 $\pm$ 0.1     |
| MV                 | 455 $\pm$ 32 | 137 $\pm$ 27 | 402 $\pm$ 29 | 37.1 $\pm$ 0.2     |
| MV + CDIBA         | 467 $\pm$ 52 | 138 $\pm$ 13 | 387 $\pm$ 31 | 37.0 $\pm$ 0.2     |
| MV + MitoT         | 458 $\pm$ 34 | 140 $\pm$ 19 | 399 $\pm$ 20 | 37.2 $\pm$ 0.3     |
| MV + CDIBA + MitoT | 472 $\pm$ 27 | 138 $\pm$ 25 | 407 $\pm$ 32 | 37.2 $\pm$ 0.3     |

BW = body weight ;MAP = mean arterial pressure ;HR = heart rate ;RT = rectal temperature; MV = mechanical ventilation ; CDIBA = 4-{2-[5-chloro-1-(diphenylmethyl)-2-methyl-1H-indol-3-yl]-ethoxy} benzoic acid (cPLA2 inhibitor); MitoT = MitoTEMPO. BW were determined before the experiment. Values of MAP, HR, and RT at the end of study are presented here.
